# Supplementary material for: ELAVL1 Primarily Couples mRNA Stability with the 3’UTRs of Interferon Stimulated Genes
Source: bioRxiv or medRxiv preprint supplement (doi:10.1101/2020.08.24.263418), 2020-09-07

## SUPPLEMENTAL FIGURE LEGENDS

### **Supplemental Figure 1: PAR-CLIP identifies and maps the cell-type specific and condition specific binding sites of ELAVL1**

**(S1A)** Gene expression analysis using qPCR measuring the mRNA levels of *IFNB1*. THP-1 cells were stimulated with the STING agonist cGAMP (EC50) and RNA was collected at indicated timepoints.

**(S1B)** Bar graph showing the number of clusters that mapped either to exons and introns across the two cellular conditions. Inset shows the average number of unique reads for each exonic- or intronic- cluster across the conditions.

**(S1C)** Venn diagram showing the overlap of target mRNAs from HEK293 (Mukherjee et al. 2011) and THP-1 naïve.

**(S1D)** Reactome pathway analysis for the mRNAs that were unique bound by THP-1s compared to HEK293.

**(S1E)** Metagene analysis showing the normalized distribution of binding sites across introns or **(S1F)** the 3'UTR across both conditions.

**(S1G)** Metagene analysis showing the distribution of binding sites in the 3'UTR that are 200 nucleotides downstream of the poly-A tail.

### **Supplemental Figure 2: PAR-CLIP and RIP-Seq identify enriched transcripts that are condition independent or dependent**

**(S2A)** Venn diagram showing the overlap between the bound (PAR-CLIP) and enriched (RIP-Seq) mRNA transcripts across conditions.

**(S2B)** Bar graph of a Reactome pathway analysis for each group of transcripts that were either shared (from S2A) between the two conditions or unique bound and enriched in the naïve **(S2C)** or **(S2D)** the stimulated states.

### **Supplemental Figure 3: KO determines transcripts whose half-lives are dependent on the presence of ELAVL1**

**(S3A)** Cumulative distribution plot of the log<sub>2</sub> foldchange (KO/wt) in half-life showing the group of transcripts whose half-lives are most affected by the loss of ELAVL1.

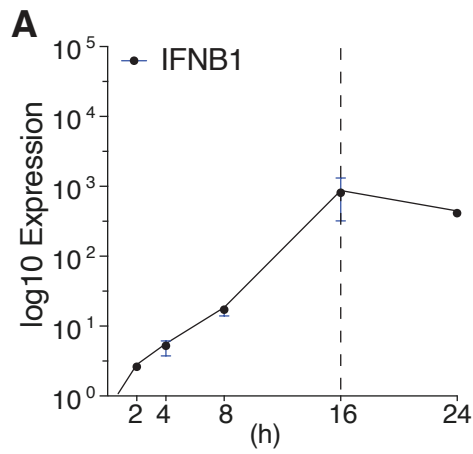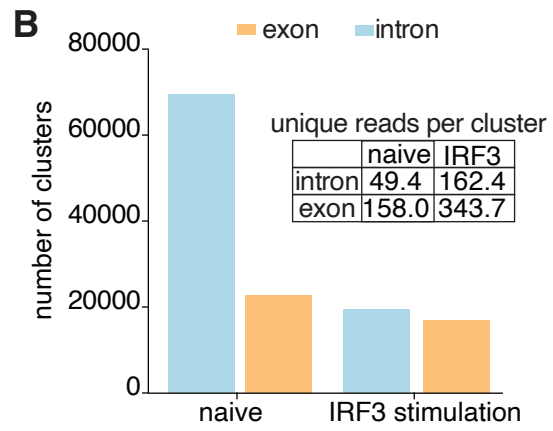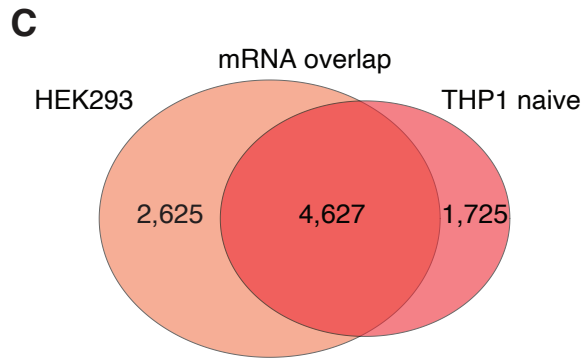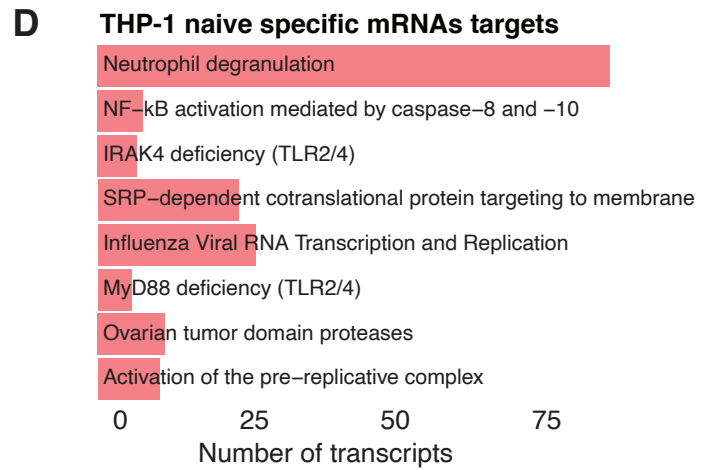

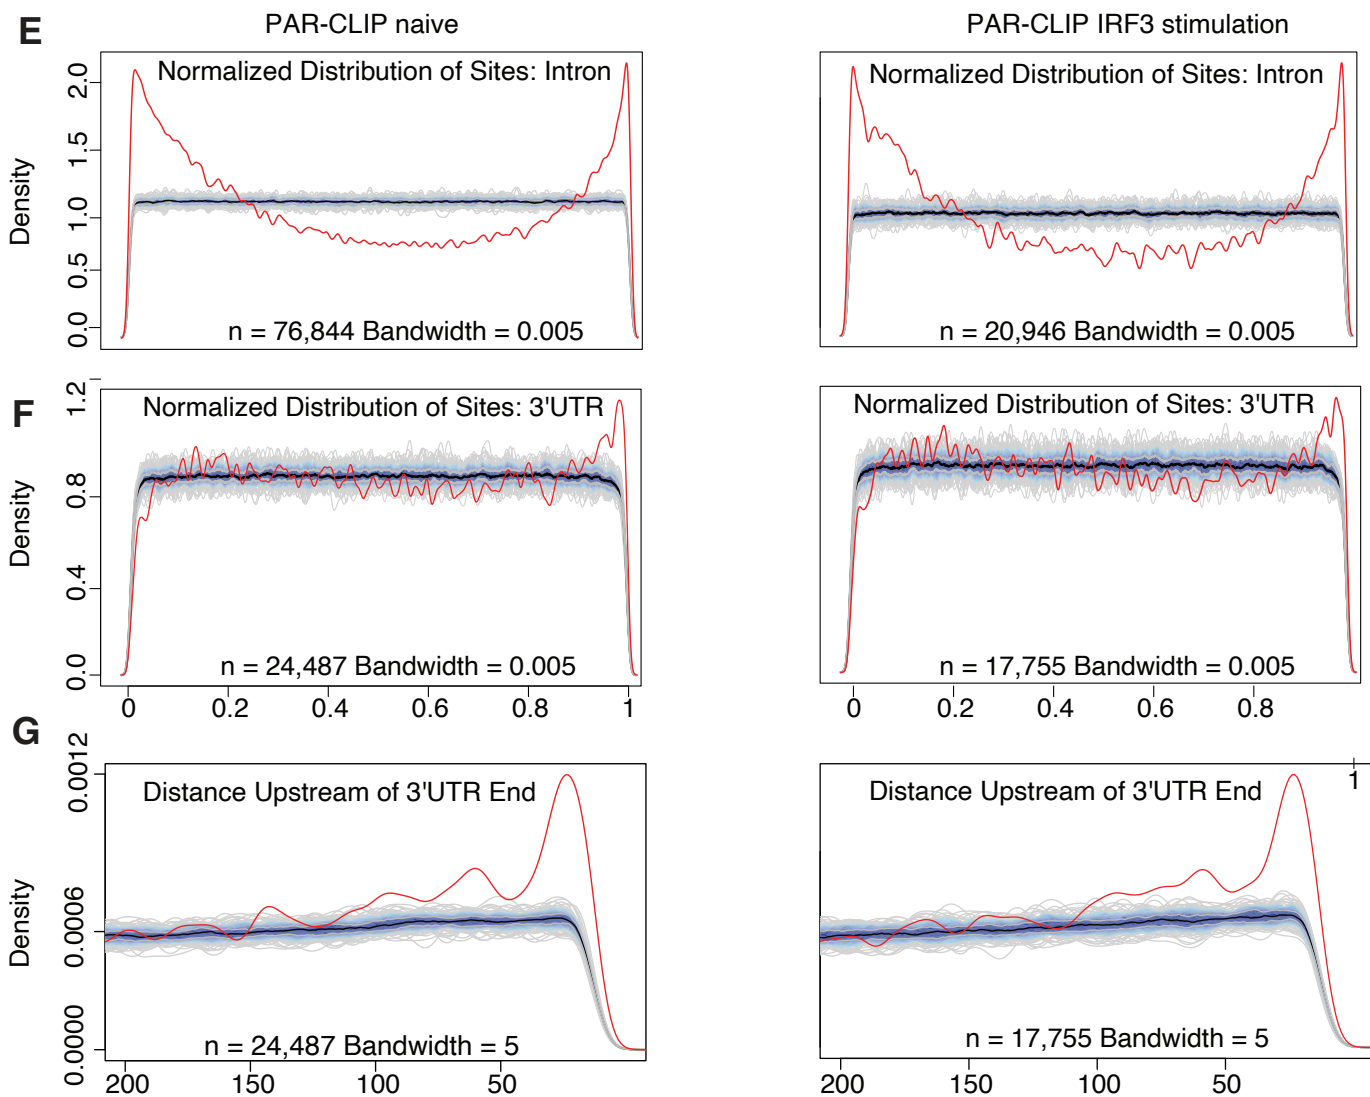

**A**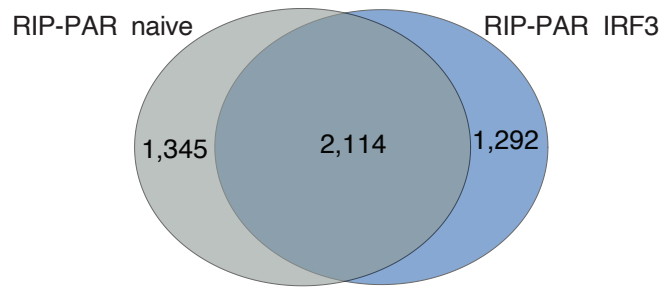**B****condition independent THP-1 mRNA targets**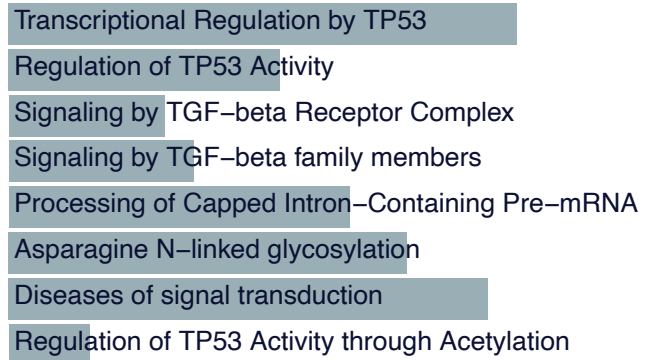

0 25 50 75  
Number of transcripts

**C****naive specific mRNA targets**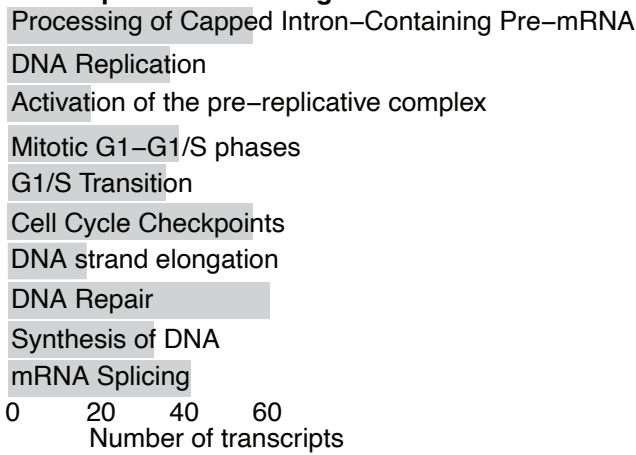

0 20 40 60  
Number of transcripts

**D****IRF3 specific mRNA targets**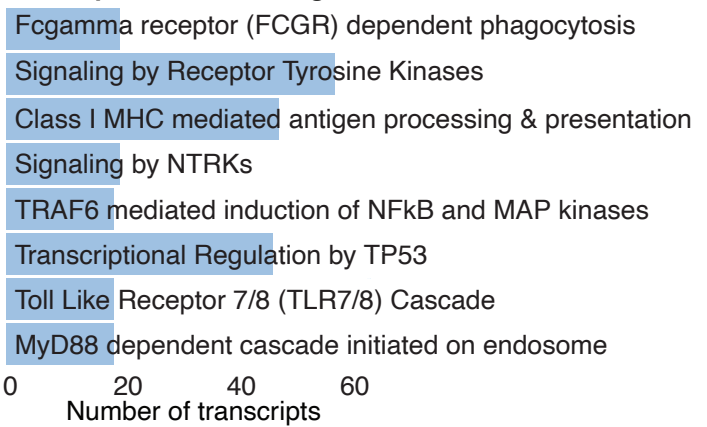

0 20 40 60  
Number of transcripts

## Supplemental Figure 3

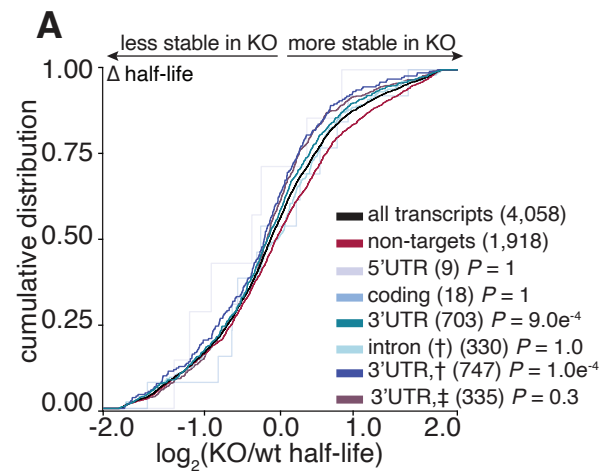

Supplement: Supplementary file [file media-1.pdf]
